# Supplementary material for: N-Allyl-N-tert-butyldimethylsilylamine for chiral ligand-controlled asymmetric conjugate addition to tert-butyl alkenoatesElectronic supplementary information (ESI) available: general procedure for addition reaction, deallylation, silylation of allylamine and data for compounds. See http://www.rsc.org/suppdata/cc/b4/b405347h/
Source: Royal Society of Chemistry journal article supplement (doi:10.1039/b405347h), 2004-01-01
Supplement: b405347h.doc [file b405347h.doc]

# Supplementary Information

*N*-Allyl-*N*-*tert*-butyldimethylsilylamine for chiral ligand-controlled asymmetric conjugate addition to *tert*-butyl alkenoates

Hirohisa Doi, Takeo Sakai, Ken-ichi Yamada and Kiyoshi Tomioka*

*Graduate School of Pharmaceutical Sciences, Kyoto University,*

*Yoshida, Sakyo-ku, Kyoto 606-8501, Japan*

**General**

Extracts were dried over sodium sulfate unless otherwise noted. Purification was carried out by silica gel column chromatography unless otherwise noted. All melting points are uncorrected. IR spectra were expressed in cm–1. 1H (500 MHz) and 13C NMR (125 MHz) were measured in CDCl3. Chemical shift values were expressed in ppm downfield from internal tetramethylsilane.

**General Procedure for the External Chiral Ligand-Controlled Asymmetric Conjugate Addition of Lithium *N*-Allyl-*N*-(*tert*-butyldimethylsilyl)amide (1d) to Enoates. (*S*)-(–)-*tert*-Butyl 3-(allylamino)butanoate (4b):** **(Table 2, entry 1):** under Ar atmosphere, a 1.6 M hexane solution of *n*-BuLi (1.88 mL, 3.0 mmol) was added to a solution of *N*-allyl(*tert*-butyldimethylsilyl)amine (**1d**) (513 mg, 3.0 mmol) in toluene (8 mL) at –78 °C over 5 min. After 0.5 h, **3** (871 mg, 3.6 mmol) in toluene (6 mL) was added. The mixture was stirred for 0.5 h at –78 °C, then cooled to –95 °C, and stirred for additional 15 min. A toluene (2 mL) solution of *tert*-butyl crotonate (**2b**) (1.0 mmol) was added over 5 min. The mixture was stirred at –95 °C for 1.5 h and quenched with satd. NH4Cl (3 mL). After addition of satd. NaHCO3 (4.5 mL), the whole was extracted with AcOEt. The organic layer was washed with brine, dried, and concentrated to give a crude product. To a solution of the crude product in MeCN (30 mL) was added 46% HF (3 mL) at rt, and the mixture was stirred for 5 min. After addition of satd. NaHCO3, the mixture was extracted with AcOEt. The organic layer was washed with brine and dried. Concentration and chromatography (AcOEt/hexane = 1/1) gave **3** (870 mg, quantitative recovery) and **4b** as a colorless oil of []25D +2.7 (*c* 0.98, CHCl3). The enantiomeric excess was determined to be 90% ee by 1H NMR using (*S*)-(–)-1,1’-bi-2,2’-naphthol as a chiral shift reagent, judged by the integral areas of the peaks of the methyl groups (the major peak in 0.81 ppm and the minor peak in 0.85 ppm). 1H NMR: 1.11 (3H, d, *J* = 6.4 Hz), 1.45 (9H, s), 1.66 (1H, brs), 2.26 (1H, dd, *J* = 5.8, 15.0 Hz), 2.38 (1H, dd, *J* = 6.8, 15.0 Hz), 3.10 (1H, qdd, *J* = 5.8, 6.4, 6.8 Hz), 3.22 (1H, dd, *J* = 6.4, 14.1 Hz), 3.29 (1H, dd, *J* = 5.8, 14.1 Hz), 5.09 (1H, d, *J* = 10.4 Hz), 5.19 (1H, d, *J* = 17.1 Hz), 5.87–5.95 (1H, m). 13C NMR: 20.2, 28.0, 49.6, 49.7, 80.4, 115.8, 136.9, 171.8. IR (neat): 3333, 1728, 1153 cm–1. EIMS *m/z*: 199 (M+). Anal. Calcd for C11H21NO2: C, 66.29; H, 10.62; N, 7.03. Found: C, 66.56; H, 10.56; N, 6.98.

Recrystallization of recovered **3** from hexane gave pure **3** almost quantitatively and can be reused in an asymmetric reaction.

**(*R*)-(+)-*tert*-Butyl 3-(allylamino)-3-phenylpropanoate (4a):** chromatography (AcOEt/hexane = 1/5) gave the titled compound as a colorless oil of []25D +15.2 (*c* 1.05, CHCl3): 69% oy. 1H NMR: 1.38 (9H, s), 1.86 (1H, brs), 2.53 (1H, dd, *J* = 5.8, 15.3 Hz), 2.64 (1H, dd, *J* = 8.6, 15.3 Hz), 3.03 (1H, dd, *J* = 6.8, 14.1 Hz), 3.10 (1H, dd, *J* = 5.5, 14.1 Hz), 4.06 (1H, dd, *J* = 5.8, 8.6 Hz), 5.06 (1H, d, *J* = 10.4 Hz), 5.12 (1H, d, *J* = 10.4 Hz), 5.82–5.90 (1H, m), 7.22–7.32 (5H, m). 13C NMR: 27.9, 44.0, 49.8, 59.0, 80.6, 115.8, 127.2, 127.3, 128.5, 136.8, 142.6, 171.1. IR (neat): 3333, 1728, 1150 cm–1. EIMS *m/z*: 261 (M+). Anal. Calcd for C16H23NO2: C, 73.53; H, 8.87; N, 5.36. Found: C, 73.66; H, 8.64; N, 5.40.

**(+)-*tert*-Butyl 3-(allylamino)-4-methylpentanoate (4c):** chromatography (AcOEt/hexane = 1/5) gave the titled compound as a colorless oil of []25D +2.9 (*c* 0.52, CHCl3). The optical purity was determined to be 76% by 1H NMR using (*S*)-(–)-1,1’-bi-2,2’-naphthol as a chiral shift reagent, judged by the integral areas of the peaks of the methyl groups (the major peak in 0.86 ppm and the minor peak in 0.87 ppm). 1H NMR: 0.88 (3H, d, *J* = 6.7 Hz), 0.91 (3H, d, *J* = 7.1 Hz), 1.45 (9H, s), 1.82 (1H, brs), 1.78–1.87 (1H, m), 2.21 (1H, dd, *J* = 8.3, 15.3 Hz), 2.33 (1H, dd, *J* = 4.9, 15.3 Hz), 2.82 (1H, ddd, *J* = 4.9, 8.3, 8.9 Hz), 3.25 (2H, d, *J* = 5.8 Hz), 5.07 (1H, d, *J* = 9.5 Hz), 5.18 (1H, d, *J* = 17.1 Hz), 5.86–5.93 (1H, m). 13C NMR: 17.5, 18.8, 28.0, 30.4, 37.3, 50.1, 59.5, 80.3, 115.7, 137.2, 172.6. IR (neat): 3300, 1728, 1153 cm–1. HRMS–CI (*m/z*): [M + H]+ Calcd for C13H26NO2: 228.1964. Found: 228.1969.

**(+)-*tert*-Butyl 3-(allylamino)-4-hexenoate (4d):** chromatography (AcOEt/hexane = 1/3) gave the titled compound as a colorless oil of []25D +2.1 (*c* 1.04, CHCl3). The optical purity was determined to be 75% by 1H NMR using (*S*)-(–)-1,1’-bi-2,2’-naphthol as a chiral shift reagent, judged by the integral areas of the peaks of the *tert*-butyl groups (the major peak in 1.32 ppm and the minor peak in 1.31 ppm). 1H NMR: 1.44 (9H, s), 1.68 (3H, dd, *J* = 1.5, 6.7 Hz), 1.71 (1H, brs), 2.34 (1H, dd, *J* = 6.1, 15.0 Hz), 2.42 (1H, dd, *J* = 7.4, 15.0 Hz), 3.12 (1H, dd, *J* = 6.4, 14.1 Hz), 3.26 (1H, dd, *J* = 5.5, 14.1 Hz), 3.41 (1H, ddd, *J* = 6.1, 7.0, 7.4 Hz), 5.07 (1H, dd, *J* = 1.5, 10.1 Hz), 5.16 (1H, dd, *J* = 1.5, 17.1 Hz), 5.27 (1H, m), 5.59 (1H, qd, *J* = 6.7, 8.6 Hz), 5.85–5.92 (1H, m). 13C NMR: 17.7, 28.2, 42.2, 49.7, 57.2, 80.6, 115.9, 127.8, 132.4, 137.0, 171.1. IR (neat): 3333, 1728, 1157 cm–1. EIMS *m/z*: 225 (M+). Anal. Calcd for C13H23NO2: C, 69.29; H, 10.29; N, 6.22. Found: C, 69.44; H, 10.56; N, 5.97.

**(+)-*tert*-Butyl 3-(allylamino)-3-(1-naphthyl)propanoate (4e):** chromatography (AcOEt/hexane = 1/10) gave the titled compound as a colorless oil of []25D +18.4 (*c* 1.32, CHCl3). 94% ee (HPLC, Daicel Chiralcel OD-H, hexane/*i*-PrOH = 200/1, 1.0 mL/min, 254 nm, major 10.9 min and minor 19.6 min). 1H NMR: 1.38 (9H, s), 1.92 (1H, brs), 2.68 (1H, dd, *J* = 8.6, 15.6 Hz), 2.73 (1H, dd, *J* = 4.6, 15.6 Hz), 3.09 (1H, dd, *J* = 6.7, 14.0 Hz), 3.19 (1H, dd, *J* = 5.5, 14.0 Hz), 4.96 (1H, dd, *J* = 4.6, 8.6 Hz), 5.06 (1H, d, *J* = 10.4 Hz), 5.12 (1H, d, *J* = 17.1 Hz), 5.87–5.95 (3H, m), 7.67 (1H, d, *J* = 7.1 Hz), 7.76 (1H, d, *J* = 8.0 Hz), 7.87 (1H, d, *J* = 8.0 Hz), 8.25 (1H, d, *J* = 8.6 Hz). 13C NMR: 28.0, 43.6, 50.0, 80.8, 115.8, 123.0, 123.8, 125.4, 125.6, 126.0, 127.7, 129.0, 131.4, 134.0, 136.9, 138.3, 171.4. IR (neat): 3337, 1728, 1150 cm–1. EIMS *m/z*: 311 (M+). Anal. Calcd for C20H25NO2: C, 77.14; H, 8.09; N, 4.50. Found: C, 77.27; H, 8.14; N, 4.45.

**(1*R*,2*S*)-(–)-*tert*-Butyl 2-(allylamino)cyclopentanecarboxylate (*cis*-4f):** chromatography (Et2O/hexane = 1/3) gave the titled compound as a colorless oil of []25D –36.4 (*c* 1.02, CHCl3). The optical purity was determined to be 82% ee by 1H NMR using (*S*)-(–)-1,1’-bi-2,2’-naphthol as a chiral shift reagent, judged by the integral areas of the peaks of the *tert*-butyl groups (the major peak in 1.34 ppm and the minor peak in 1.35 ppm). 1H NMR: 1.46 (9H, s), 1.52–1.65 (4H, m), 1.78–1.99 (4H, m), 2.82–2.86 (1H, m), 3.23–3.27 (3H, m), 5.06 (1H, dd, *J* = 1.8, 10.4 Hz), 5.17 (1H, dd, *J* = 1.8, 17.1 Hz), 5.86–5.94 (1H, m). 13C NMR: 22.1, 27.6, 28.1, 31.7, 48.0, 51.1, 61.7, 80.1, 115.5, 137.1, 174.2. IR (neat): 3337, 1724, 1153 cm–1. EIMS *m/z:* 225 (M+). Anal. Calcd for C13H23NO2: C, 69.29; H, 10.29; N, 6.22. Found: C, 69.38; H, 10.29; N, 6.06.

**(1*S*,2*S*)-(–)-*tert*-Butyl 2-(benzylamino)cyclopentanecarboxylate (*trans*-4f):** chromatography (Et2O/hexane = 1/3) gave the titled compound as a colorless oil of []25D + 43.0 (*c* 1.11, CHCl3). The optical purity was determined to be 84% ee by 11H NMR using (*S*)-(–)-1,1’-bi-2,2’-naphthol as a chiral shift reagent, judged by the integral areas of the peaks of the C2 protons (the major peak in 2.39 ppm and the minor peak in 2.24 ppm). 1H NMR: 1.45 (9H, s), 1.36–2.02 (6H, m), 2.46 (1H, ddd, *J* = 7.6, 7.6, 8.6 Hz), 3.21–3.29 (1H and 2H, m), 5.09 (1H, dd, *J* = 1.2, 10.1 Hz), 5.18 (1H, dd, *J* = 1.2, 17.4 Hz), 5.87–5.95 (1H, m). 13C NMR: 23.4, 28.0, 28.6, 33.2, 51.0, 51.8, 62.6, 80.2, 115.9, 136.8, 175.1. IR (neat): 3333, 1728, 1149 cm–1. EIMS *m/z:* 225 (M+). Anal. Calcd for C13H23NO2: C, 69.29; H, 10.29; N, 6.22. Found: C, 69.14; H, 10.01; N, 6.04.

**Deallylation.**

**(*R*)-(+)-*tert*-Butyl 3-amino-3-phenylpropionate (5):** Rh(PPh3)3Cl (35 mg, 0.038 mmol) was added to a solution of **4c** (80.4 mg, 0.36 mmol) in MeCN/H2O (5.4 mL, 85/15) under argon atmosphere, and the mixture was heated at reflux for 1 h. The volatile materials were removed in vacuo, and the residue passed through a small plug of alumina (eluent: Et2O). Concentration and chromatography (AcOEt/hexane = 1/1) gave the titled compound (73 mg, 87%) of []25D +15.3 (*c* 0.95, CHCl3). 1H NMR: 1.42 (9H, s), 1.89 (2H, brs), 2.59 (2H, d, *J* = 6.8 Hz), 4.38 (1H, t, *J* = 6.8 Hz), 7.23–7.37 (5H, m). 13C NMR: 28.0, 45.3, 52.7, 80.7, 126.3, 127.3, 128.5, 144.7, 171.3. IR (neat): 3383, 2978, 1724, 1150 cm–1. EIMS *m/z:* 221 (M+). S. G. Davies, N. M. Garrido, O. Ichihara, I. A. S. Walters, *J. Chem. Soc., Chem. Commun.*, 1993, 1153–1155.

**(*S*)-(–)-*tert*-Butyl 3-(benzyloxycarbonylamino)butanoate (6):** Rh(PPh3)3Cl (33 mg, 0.036 mmol) was added to a solution of **4b** (71 mg, 0.36 mmol) in 5.6 mL of MeCN/H2O (85/15) under argon atmosphere and heated at reflux for 2.0 h. The volatiles were removed, and the residue passed through a small plug of alumina (eluent: Et2O) and concentrated. To a solution of the resulting crude material in 50% aqueous MeOH (1.6 ml), was added NaHCO3 (75.3 mg, 0.9 mmol) and benzyloxycarbonylchloride (91.6 mg, 0.54 mmol) at 0 °C, and the whole was stirred at room temperature for 9 h. The reaction mixture was poured into satd. NH4Cl and satd. NaHCO3. The mixture was extracted with AcOEt, and the organic layer was washed with brine and dried. Concentration and chromatography (AcOEt/hexane = 1/5) gave the titled compound as a colorless oil of []25D –10.0 (*c* 0.88, CH2Cl2). 1H NMR: 1.23 (3H, d, *J* = 6.7 Hz), 1.44 (9H, s), 2.42 (2H, d, *J* = 5.5 Hz), 4.04–4.12 (1H, m), 5.09 (2H, s), 5.25 (1H, s), 7.29–7.36 (5H, m). 13C NMR: 20.3, 28.0, 41.7, 44.2, 66.5, 81.0, 128.1, 128.5, 136.6, 155.6, 170.8. IR (neat): 3325, 1724, 1535, 1246, 1157, 1057 cm–1. EIMS *m/z:* 293 (M+). D. A. Evans, L. D. Wu, J. J. M. Wiener, J. S. Johnson, D. H. B. Ripin, J. S. Tedrow, *J. Org. Chem.* 1999, **64**, 6411–6417.

**(1*R*, 2*S*)-(–)-*tert*-Butyl 2-aminocyclopentanecarboxylate (7):** the same procedure as **5** and chromatography (AcOEt) gave the titled compound as a colorless oil (93%) of []25D –4.0 (*c* 1.00, CHCl3). 1H NMR: 1.47 (9H, s), 1.49–1.60 (4H, m), 1.79–2.02 (4H, m), 2.67–2.72 (1H, m), 3.54–3.58 (1H, m). 13C NMR: 22.3, 26.2, 28.2, 34.8, 51.1, 54.9, 80.3, 173.6. IR (neat): 3383, 1724, 1366, 1153 cm–1. EIMS *m/z:* 185 (M+). S. G. Davies, O. Ichihara, I. Lenoir, I. A. S. Walters, *J. Chem. Soc., Perkin Trans. 1*, 1994, 1141–1145.

**Preparation of the Amines.**

*N*-Allyl-*N*-(trimethylsilyl)amine (**1b**) was purchased from Aldrich Chemical Co.

***N*-Allyl-*N*-(triethylsilyl)amine (1c)**: to a solution of allylamine (2.0 g, 35 mmol) in Et2O (35 mL) was added triethylamine (5.3 mL, 39 mmol) and DMAP (85 mg, 0.7 mmol) in Et2O (3.5 mL). To the solution was added triethylsilyl chloride (10.6 g, 70 mmol) in Et2O (17.5 mL) at 0 °C. After stirred for 18 h, the mixture was filtered. Concentration followed by distillation (170 °C/50 mmHg) gave the totled compound as a colorless oil (4.2 g, 70%). 1H NMR (C6D6): 0.51 (6H, q, *J* = 8.0 Hz), 0.97 (9 H, t, *J* = 8.0 Hz), 3.23–3.26 (2H, m), 4.95–4.98 (1H, m), 5.11–5.16 (1H, m), 5.80–5.88 (1H, m). 13C NMR (C6D6): 5.00, 7.29, 44.9, 112.6, 141.4. IR (neat): 3379, 1254, 1057, 844 cm–1.

***N*-Allyl-*N*-(*tert*-butyldimethylsilyl)amine (1d)**: the same procedure as **1c** and distillation (70 °C/2 mmHg) gave the titled compound as a colorless oil (76%). 1H NMR (C6D6): 0.00 (6H, s), 0.91 (9H, s), 4.97 (1H, d, *J* = 1.9, 10.1 Hz), 5.13 (1H, d, *J* = 1.9, 17.4 Hz), 5.79–5.87 (1H, m). 13C NMR (C6D6): –5.04, 18.5, 25.8, 26.4, 45.2, 112.6, 141.3. IR (neat): 3410, 1462, 1103, 799 cm–1. EIMS *m/z:* 171 (M+). E. W. Colvin, D. McGarry, M. J. Nugent, *Tetrahedron*, 1988, **44**, 4157–4172.

***N*-Allyl-*N*-(triisopropylsilyl)amine (1e)**: to a solution of allylamine (570 mg, 10 mmol) and triethylamine (2.1 mL, 15 mmol) in MeCN (17 mL) was added triisopropylsilyl chloride (2.1 mL, 10 mmol) in MeCN (10 mL) at 0 °C. After stirred at room temperature for 5 h, the reaction mixture was diluted with AcOEt and filtered. Concentration followed by distillation (150 °C/18 mmHg) gave the titled compound as a colorless oil (1.64 g, 77%). 1H NMR (C6D6): 0.93–1.06 (18H and 3H, m), 3.29–3.32 (2H, s), 4.98–5.01 (1H, m), 5.17–5.21 (1H, m), 5.83–5.91 (1H, m). 13C NMR (C6D6): 11.9, 18.4, 45.4, 112.7, 141.2. IR (neat): 3410, 1462, 1103, 799 cm–1. HRMS–CI (*m/z*): [M + H]+ Calcd for C12H28NSi: 214.1991. Found: 214.1986.
